# Supplementary material
Source: PubMed Central journal article supplement (PMC4601553)
Supplement: Supp_Fig1.pdf [file Supp_Fig1.pdf]

## Supplementary Data

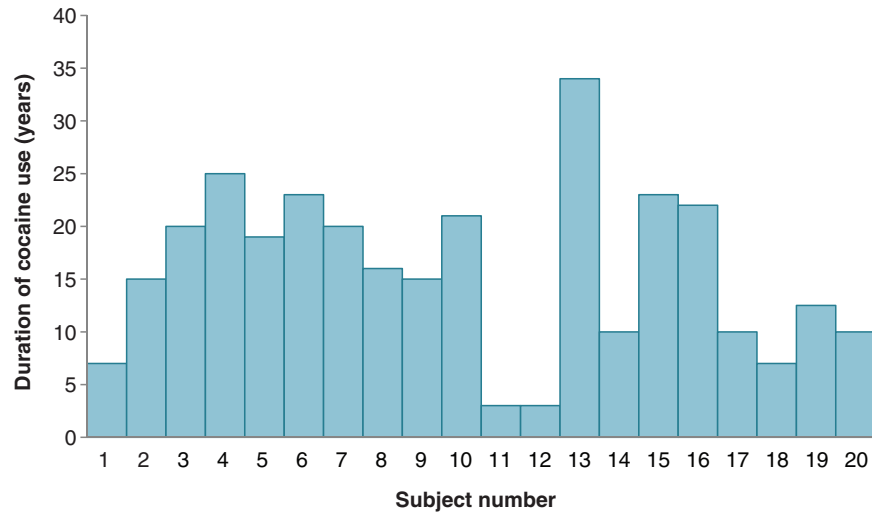

**SUPPLEMENTARY FIG. S1.** Histogram of cocaine use duration (in years) for study participants.
